# Supplementary figures and images for: Randomized Phase III Trial of Irinotecan Plus Cisplatin versus Etoposide Plus Cisplatin in Chemotherapy-Naïve Korean Patients with Extensive-Disease Small Cell Lung Cancer
Source: PubMed Central journal article supplement — Cancer Res Treat. 2018 Mar 12;51(1):119–27. doi: 10.4143/crt.2018.019 (PMC6334001; doi:10.4143/crt.2018.019), 2018-03-12

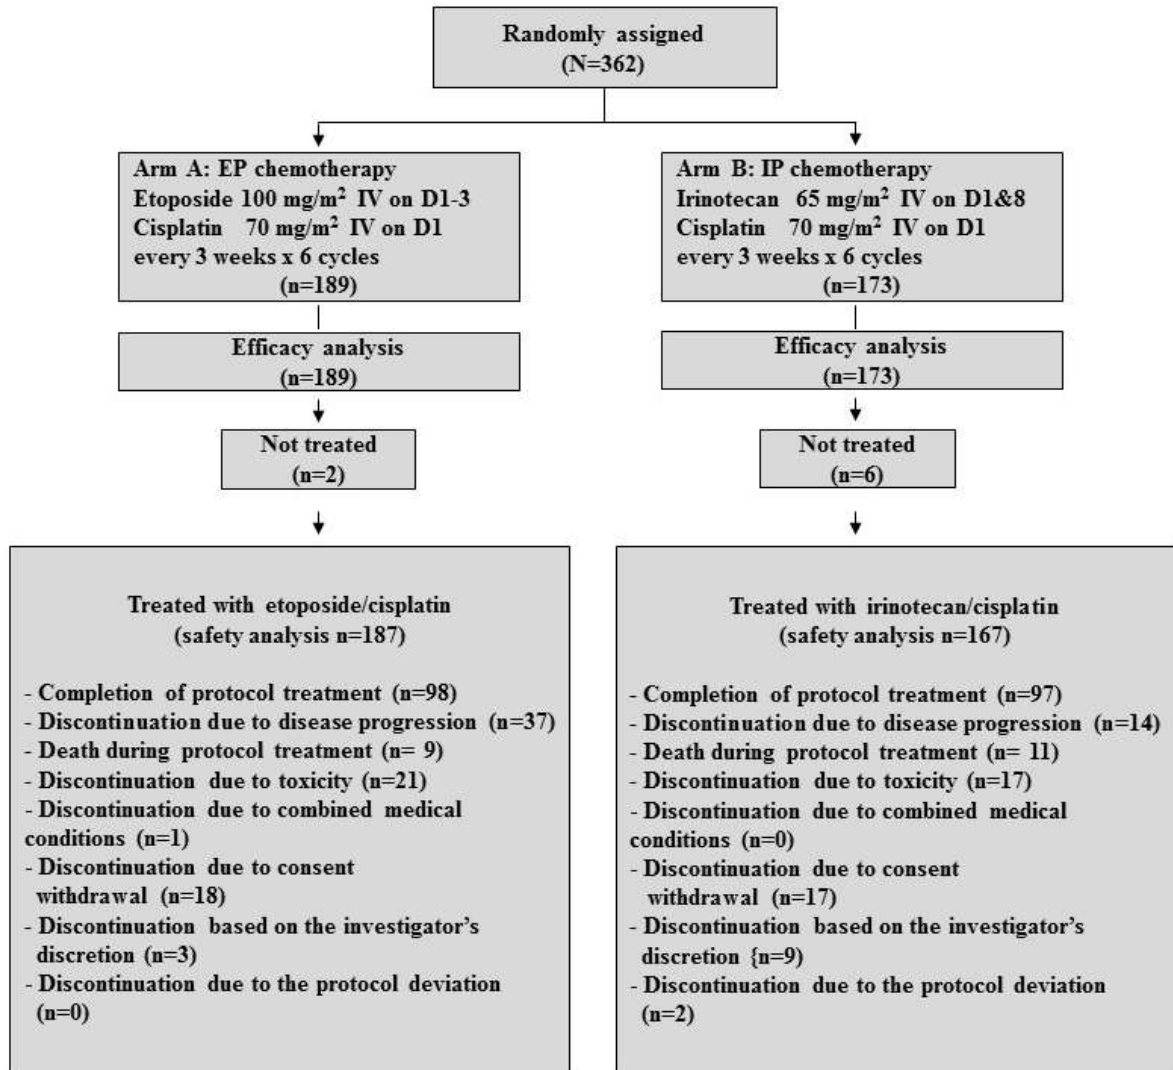

**S1 Fig.** CONSORT diagram. IV, intravenously.

Supplement: crt-2018-019-suppl.pdf [file crt-2018-019-suppl.pdf]
